# Supplementary material for: Prevalence and association of pks+ Escherichia coli with colorectal cancer in patients at the University Malaya Medical Centre, Malaysia
Source: PLOS journal article supplement (doi:10.1371/journal.pone.0228217), 2020-01-28
Supplement: S2 (10.1371/journal.pone.0228217.s002) [file journal.pone.0228217.s002]

## *Supplementary Material*

**S1 Table.** Cell confluency for both primary colon epithelial cell line and colorectal carcinoma cell line at 0, 24, 48 and 72 hours

| Infection time (hours) | Type of cell line                                                                   |                                                                                      |
|------------------------|-------------------------------------------------------------------------------------|--------------------------------------------------------------------------------------|
|                        | Primary colon                                                                       | HCT 116                                                                              |
| 0                      | 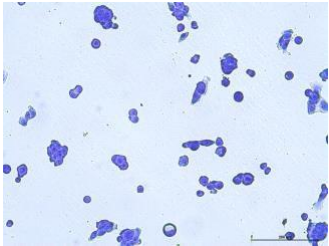   |    |
| 24                     |   |   |
| 48                     |  |  |
| 72                     |  |  |
